# Supplementary material
Source: MDPI journal article supplement (https://www.mdpi.com/2075-163X/11/8/884)
Supplement: s1 [file s1]

# Supplementary Materials: Adsorption of Selected Heavy and Precious Metals from Simulated Wastewater Using Fabricated Polyacrylonitrile (PAN) and Poly(4-vinylpyridine) (P4VP) Monoliths

Keziah E. Liebenberg, Abayneh A. Ambushe and Orpah Zinyemba\*

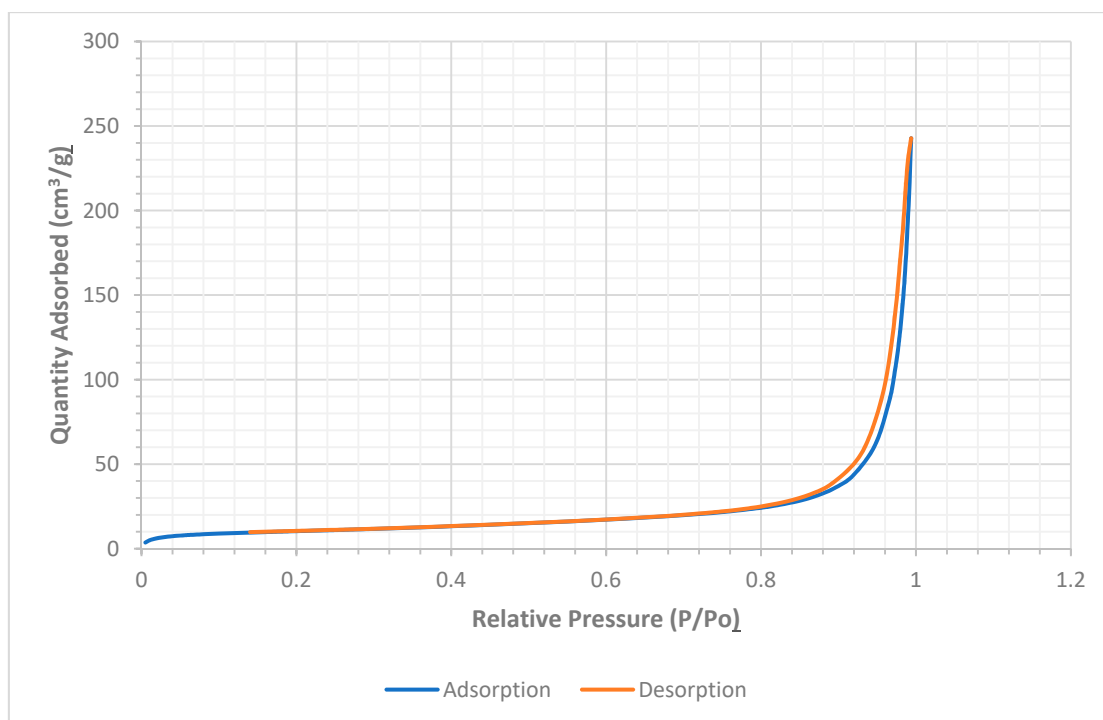

**Figure S1.** BET adsorption isotherm for crushed unfabricated neat PAN.

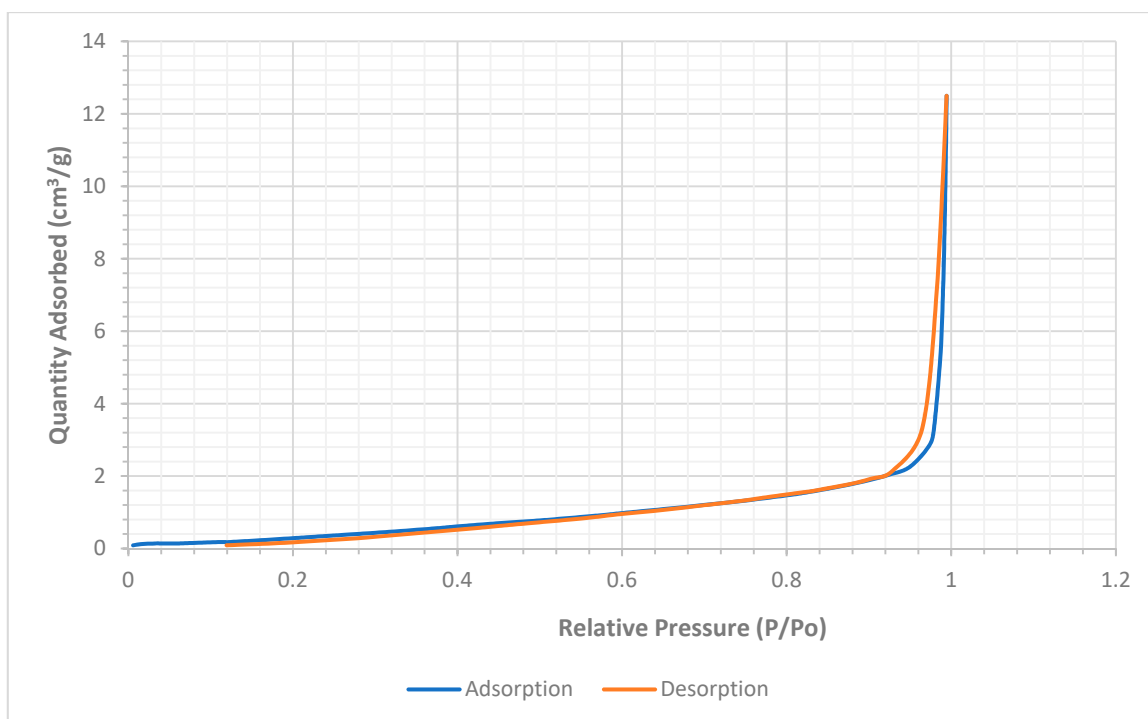

**Figure S2.** BET adsorption isotherm for crushed neat PAN monoliths.

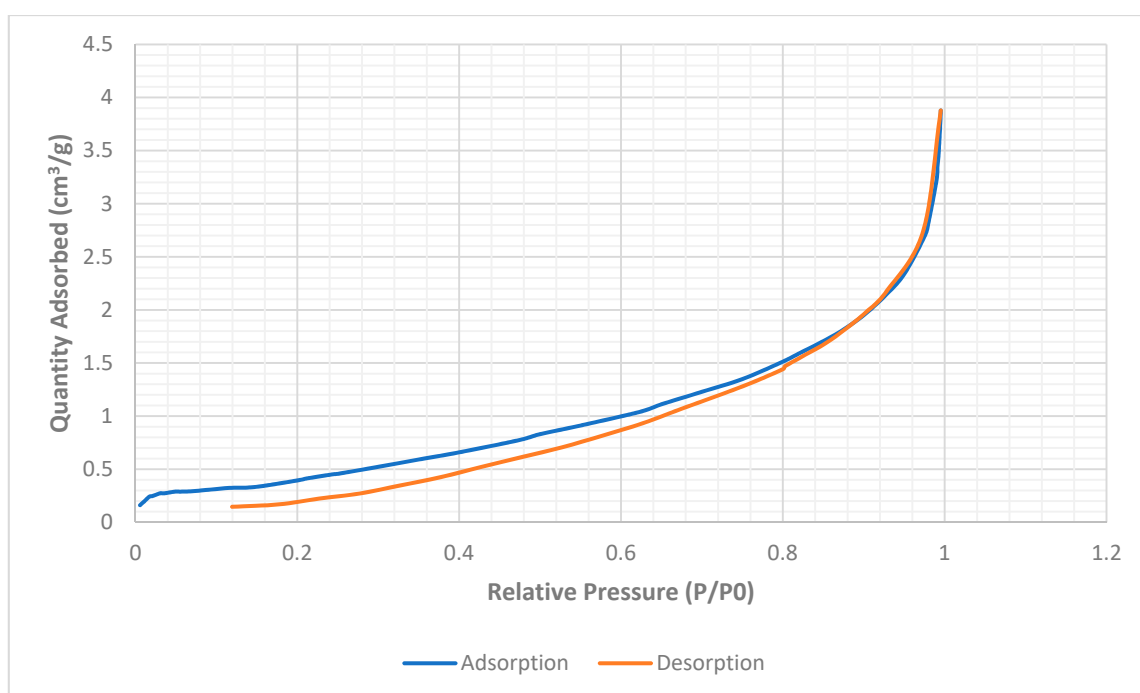

**Figure S3.** BET adsorption isotherm of crushed composite polymer monoliths.

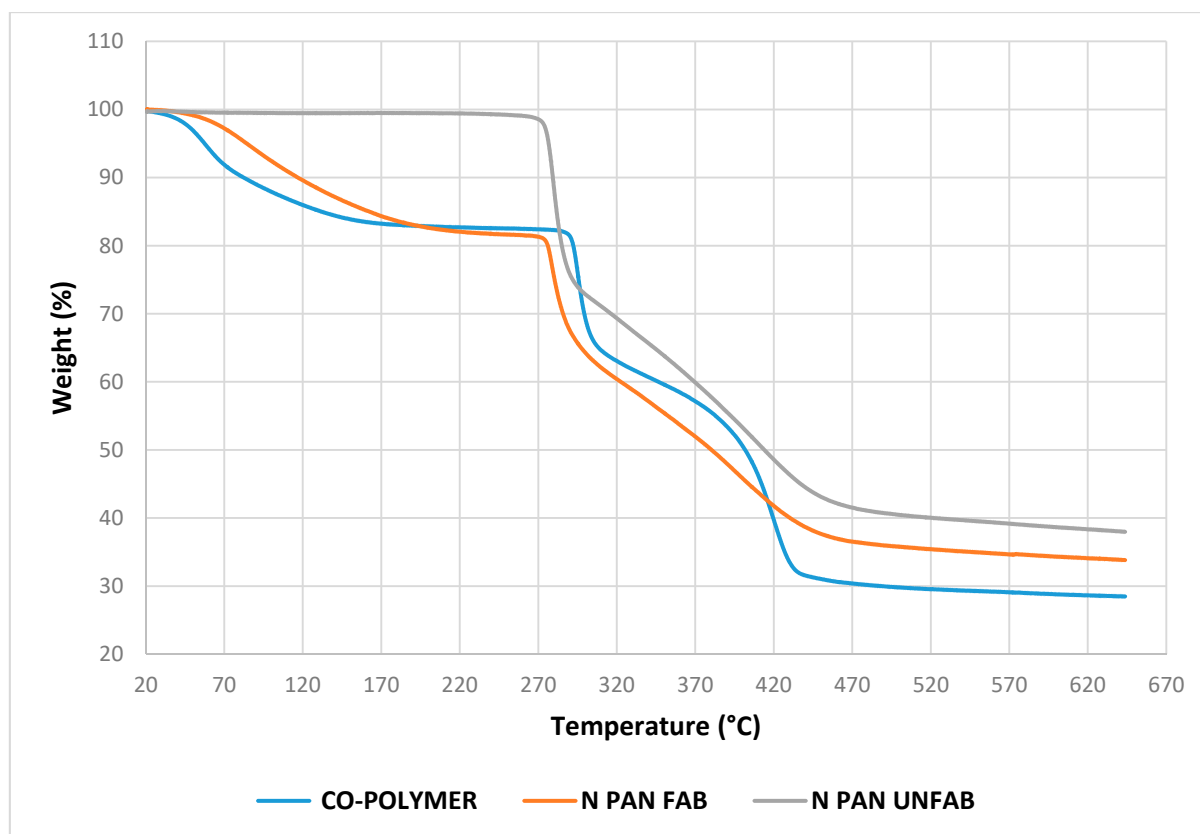

**Figure S4.** TGA curve representing the weight loss (%) of unfabricated raw PAN, mesoporous neat PAN and mesoporous composite polymer monoliths over a temperature range of 25 °C to 650 °C.
